# Supplementary material for: Metformin and cyanidin 3-O-galactoside fromAronia melanocarpasynergistically alleviate cognitive impairment in SAMP8 mice
Source: Royal Society of Chemistry journal article supplement (doi:10.1039/d1fo02122b), 2021-01-01
Supplement: d1fo02122b1.pdf [file d1fo02122b1.pdf]

### Supplementary Figure:

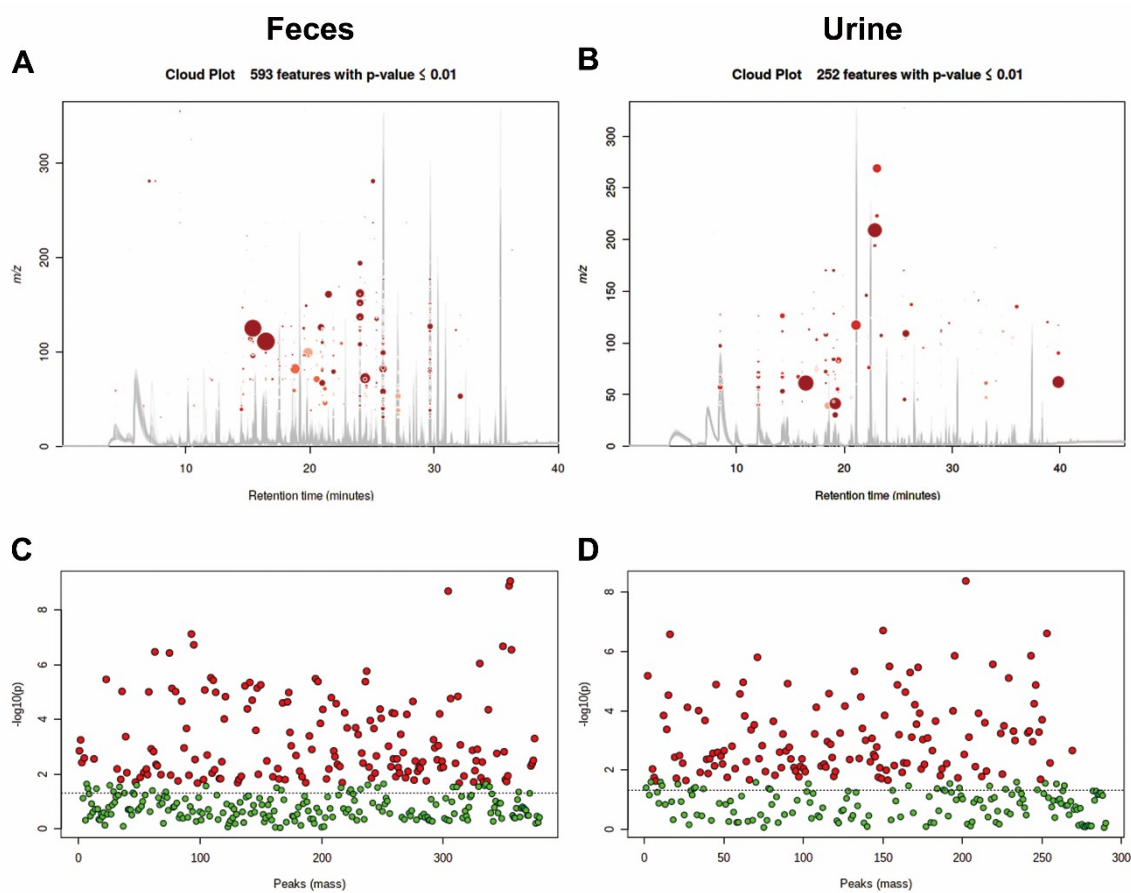

**Figure S1**

Figure S1. Different treatment changed metabolites in senescence accelerated mice, significant features were shown in XCMS cloud plots of feces (A) and urine (B) with p-value ≤ 0.01. Important features of feces (C) and urine (D) selected by ANOVA plot with p-value < 0.05 by MetaboAnalyst.

## Supplementary Table:

**Table S1:**

Table S1. Body weight and organ/body weight index of mice

| Group      | 4 month     | 6 month                   | Organ/body weight index (g/100g body weight) |                           |             |             |
|------------|-------------|---------------------------|----------------------------------------------|---------------------------|-------------|-------------|
|            | Initial (g) | Final (g)                 | Heart                                        | Liver                     | Spleen      | Kidney      |
| SAMR1      | 28.29±2.90  | 31.49±1.63 <sup>###</sup> | 0.800±0.112                                  | 5.084±0.270               | 0.278±0.053 | 1.692±0.290 |
| SAMP8      | 27.55±2.22  | 29.90±2.04 <sup>##</sup>  | 0.880±0.159                                  | 5.803±0.522 <sup>**</sup> | 0.270±0.040 | 1.800±0.231 |
| Donepezil  | 28.34±1.97  | 28.47±1.53                | 0.929±0.134                                  | 5.776±0.518 <sup>**</sup> | 0.473±0.217 | 1.737±0.229 |
| Metformin  | 27.26±2.17  | 30.08±2.18 <sup>##</sup>  | 0.893±0.249                                  | 5.594±0.399 <sup>**</sup> | 0.421±0.292 | 1.740±0.175 |
| Cy3Gal     | 28.66±1.40  | 30.38±1.27                | 0.850±0.113                                  | 5.400±0.176 <sup>*</sup>  | 0.367±0.167 | 1.701±0.265 |
| Cy3Gal+Met | 28.04±2.23  | 29.88±0.90 <sup>#</sup>   | 0.808±0.133                                  | 5.580±0.233 <sup>*</sup>  | 0.320±0.072 | 1.899±0.114 |

Compare with the body weight of 4 month and 6 month, #  $P < 0.05$ , ##  $P < 0.01$ , ###  $P < 0.001$

Compare with SAMR1 group, \*  $P < 0.05$ , \*\*  $P < 0.01$

**Table S2**

Table S2. Number of peak pairs of feces and urine samples from GC-MS.

| Sample name        | peak pair number | Sample name        | peak pair number |
|--------------------|------------------|--------------------|------------------|
| Feces-SAMR1-1      | 1971             | Urine-SAMR1-1      | 999              |
| Feces-SAMR1-2      | 1713             | Urine-SAMR1-2      | 850              |
| Feces-SAMR1-3      | 1875             | Urine-SAMR1-3      | 759              |
| Feces-SAMR1-4      | 1605             | Urine-SAMR1-4      | 776              |
| Feces-SAMR1-5      | 1849             | Urine-SAMR1-5      | 891              |
| Feces-SAMR1-6      | 1768             | Urine-SAMR1-6      | 876              |
| Feces-SAMP8-1      | 1692             | Urine-SAMP8-1      | 900              |
| Feces-SAMP8-2      | 1983             | Urine-SAMP8-2      | 927              |
| Feces-SAMP8-3      | 2068             | Urine-SAMP8-3      | 916              |
| Feces-SAMP8-4      | 1754             | Urine-SAMP8-4      | 885              |
| Feces-SAMP8-5      | 2097             | Urine-SAMP8-5      | 919              |
| Feces-SAMP8-6      | 1945             | Urine-SAMP8-6      | 1069             |
| Feces-Donepezil-1  | 2012             | Urine-Donepezil-1  | 992              |
| Feces-Donepezil-2  | 1527             | Urine-Donepezil-2  | 796              |
| Feces-Donepezil-3  | 1513             | Urine-Donepezil-3  | 888              |
| Feces-Donepezil-4  | 1991             | Urine-Donepezil-4  | 961              |
| Feces-Donepezil-5  | 2027             | Urine-Donepezil-5  | 929              |
| Feces-Donepezil-6  | 1682             | Urine-Donepezil-6  | 1056             |
| Feces-Metformin-1  | 2105             | Urine-Metformin-1  | 947              |
| Feces-Metformin-2  | 1753             | Urine-Metformin-2  | 1031             |
| Feces-Metformin-3  | 1781             | Urine-Metformin-3  | 925              |
| Feces-Metformin-4  | 1604             | Urine-Metformin-4  | 927              |
| Feces-Metformin-5  | 1943             | Urine-Metformin-5  | 981              |
| Feces-Metformin-6  | 1728             | Urine-Metformin-6  | 892              |
| Feces-Cy3Gal-1     | 1837             | Urine-Cy3Gal-1     | 822              |
| Feces-Cy3Gal-2     | 2302             | Urine-Cy3Gal-2     | 989              |
| Feces-Cy3Gal-3     | 2205             | Urine-Cy3Gal-3     | 909              |
| Feces-Cy3Gal-4     | 1863             | Urine-Cy3Gal-4     | 834              |
| Feces-Cy3Gal-5     | 2192             | Urine-Cy3Gal-5     | 909              |
| Feces-Cy3Gal-6     | 2039             | Urine-Cy3Gal-6     | 1002             |
| Feces-Cy3Gal+Met-1 | 1849             | Urine-Cy3Gal+Met-1 | 866              |
| Feces-Cy3Gal+Met-2 | 1735             | Urine-Cy3Gal+Met-2 | 972              |
| Feces-Cy3Gal+Met-3 | 2090             | Urine-Cy3Gal+Met-3 | 812              |
| Feces-Cy3Gal+Met-4 | 1812             | Urine-Cy3Gal+Met-4 | 880              |
| Feces-Cy3Gal+Met-5 | 1639             | Urine-Cy3Gal+Met-5 | 876              |
| Feces-Cy3Gal+Met-6 | 2075             | Urine-Cy3Gal+Met-6 | 886              |

**Table S3**

Table S3 The VIP compounds of PLS-DA model of feces samples

| VIP | Feature name | RT (min) | RI <sup>a</sup> | Metabolite                         | Characteristic ion | ID <sup>b</sup> | CAS        | Formula                                        | Category                             | HMDB ID     |
|-----|--------------|----------|-----------------|------------------------------------|--------------------|-----------------|------------|------------------------------------------------|--------------------------------------|-------------|
| 1   | M31T19       | 19.195   | 1610            | Butyric acid                       | 60, 73             | A               | 107-92-6   | C <sub>4</sub> H <sub>8</sub> O <sub>2</sub>   | Carboxylic acids                     | HMDB0000039 |
| 2   | M32T6        | 5.936    | -               | -                                  | 32                 | -               | -          | CH <sub>4</sub> O                              | -                                    | -           |
| 3   | M69T24       | 24.006   | 1858            | 6,10-dimethyl-5,9-Undecadien-2-one | 43, 69             | A               | 3796-70-1  | C <sub>13</sub> H <sub>22</sub> O              | Ketones                              | HMDB0031846 |
| 4   | M60T19       | 15.625   | 1449            | Acetic acid                        | 43, 45             | A               | 64-19-7    | C <sub>2</sub> H <sub>4</sub> O <sub>2</sub>   | Carboxylic acids                     | HMDB0000042 |
| 5   | M109T25      | 25.356   | 1958            | 6,10-dimethyl-5,9-Undecadien-2-ol  | 109, 69            | B               | 53837-34-6 | C <sub>13</sub> H <sub>24</sub> O              | Alcohols                             | -           |
| 6   | M67T25       | 24.508   | 1883            | 3,3-dimethyl-1,5-Heptadiene        | 69, 41             | C               | 67682-47-7 | C <sub>9</sub> H <sub>16</sub>                 | Hydrocarbons                         | -           |
| 7   | M81T26       | 25.871   | -               | -                                  | 81                 | -               | -          | -                                              | -                                    | -           |
| 8   | M74T25       | 24.933   | 1906            | Methyl isomyristate                | 74, 87             | B               | 1731-88-0  | C <sub>14</sub> H <sub>28</sub> O <sub>2</sub> | Esters                               | -           |
| 9   | M117T35      | 35.338   | 2467            | Indole                             | 117, 90            | A               | 120-72-9   | C <sub>8</sub> H <sub>7</sub> N                | Nitrogen-containing Carboxylic acids | HMDB0000738 |
| 10  | M45T21       | 21.464   | 1725            | Pentanoic acid                     | 60, 73             | A               | 109-52-4   | C <sub>5</sub> H <sub>10</sub> O <sub>2</sub>  | Carboxylic acids                     | -           |
| 11  | M87T25       | 30.897   | 2225            | Palmitic acid                      | 74, 87             | A               | 112-39-0   | C <sub>17</sub> H <sub>34</sub> O <sub>2</sub> | Esters                               | HMDB0061859 |
| 12  | M123T29      | 29.042   | -               | -                                  | 123                | -               | -          | -                                              | -                                    | -           |
| 13  | M154T26      | 25.841   | -               | -                                  | 154                | -               | -          | -                                              | -                                    | -           |
| 14  | M85T20       | 19.833   | 1642            | Methyl pentadecanoate              | 57, 71             | B               | 1921-70-6  | C <sub>19</sub> H <sub>40</sub>                | Hydrocarbons                         | HMDB0034497 |
| 15  | M95T25       | 25.351   | -               | -                                  | 95                 | -               | -          | -                                              | -                                    | -           |

a Retention indices on a polyethylene glycol (PEG) column.

b Reliability of the identification proposal: A, identified, mass spectrum and RI agreed with standards; B, tentatively identified, mass spectrum agreed with the mass spectral database and RI agreed with literature data; C, tentatively identified, mass spectrum agreed with the mass spectral database.

**Table S4**

Table S4 The VIP compounds of PLS-DA model of urine samples

| VIP | Feature name | RT (min) | RI <sup>a</sup> | Metabolite              | Characteristic ion | ID <sup>b</sup> | CAS        | Formula                                      | Category                  | HMDB ID     |
|-----|--------------|----------|-----------------|-------------------------|--------------------|-----------------|------------|----------------------------------------------|---------------------------|-------------|
| 1   | M31T23       | 22.675   | 1480            | 2-ethyl-1-Hexanol       | 57, 43             | A               | 104-76-7   | C <sub>8</sub> H <sub>18</sub> O             | Alcohols                  | HMDB0031231 |
| 2   | M126T19      | 19.36    | 1338            | 6-methyl-5-Hepten-2-one | 43, 41             | B               | 110-93-0   | C <sub>8</sub> H <sub>14</sub> O             | Ketones                   | HMDB0035915 |
| 3   | M32T7        | 7.334    | -               | -                       | 32                 | -               | -          | CH <sub>4</sub> O                            | -                         | -           |
| 4   | M41T24       | 23.933   | 1539            | Linalool                | 71, 93             | A               | 78-70-6    | C <sub>10</sub> H <sub>18</sub> O            | Alcohols                  | HMDB0036100 |
| 5   | M57T25       | 24.966   | 1590            | Hexadecane              | 57, 71             | A               | 544-76-3   | C <sub>16</sub> H <sub>34</sub>              | Hydrocarbons              | HMDB0033792 |
| 6   | M97T29       | 28.977   | -               | 2,3-dimethyl-Undecane   | 97, 71             | C               | 17312-77-5 | C <sub>13</sub> H <sub>28</sub>              | Hydrocarbons              | -           |
| 7   | M69T26       | 26.46    | 1651            | (E)- $\beta$ -Famesene  | 69, 41             | B               | 18794-84-8 | C <sub>15</sub> H <sub>24</sub>              | Hydrocarbons              | HMDB0062763 |
| 8   | M111T12      | 12.002   | 1072            | 2-ethyl-2-Hexenal       | 55, 41             | C               | 645-62-5   | C <sub>8</sub> H <sub>14</sub> O             | Aldehydes                 | HMDB0061945 |
| 9   | M67T22       | 22.486   | 1471            | 4-methyl-2-propyl-Furan | 95, 67             | C               | 6148-37-4  | C <sub>8</sub> H <sub>12</sub> O             | Ethers                    | -           |
| 10  | M191T37      | 37.41    | 2312            | 2,4-Di-tert-butylphenol | 191, 57            | A               | 96-76-4    | C <sub>14</sub> H <sub>22</sub> O            | Phenols                   | HMDB0013816 |
| 11  | M45T27       | 26.794   | 1671            | 2,4,5-Trithiahexane     | 61, 45             | B               | 42474-44-2 | C <sub>3</sub> H <sub>8</sub> S <sub>3</sub> | Sulfur-containing         | HMDB0031875 |
| 12  | M111T32      | 31.894   | 1968            | 1-Dodecanol             | 55, 43             | A               | 112-53-8   | C <sub>12</sub> H <sub>26</sub> O            | Alcohols                  | HMDB0011626 |
| 13  | M96T26       | 25.991   | -               | Levomenthol             | 95, 71             | C               | 2216-51-5  | C <sub>10</sub> H <sub>20</sub> O            | Alcohols                  | HMDB0003352 |
| 14  | M59T22       | 22.195   | -               | N-methyl-Formamide      | 59, 30             | C               | 123-39-7   | C <sub>2</sub> H <sub>5</sub> NO             | Diverse functional groups | HMDB0001122 |
| 15  | M107T36      | 35.542   | 2193            | 4-ethyl-Phenol          | 107, 122           | A               | 123-07-9   | C <sub>8</sub> H <sub>10</sub> O             | Phenols                   | HMDB0029306 |

a Retention indices on a polyethylene glycol (PEG) column.

b Reliability of the identification proposal: A, identified, mass spectrum and RI agreed with standards; B, tentatively identified, mass spectrum agreed with the mass spectral database and RI agreed with literature data; C, tentatively identified, mass spectrum agreed with the mass spectral database.
